# Supplementary material for: Using QR codes to access food information: A behavioural study with European consumers
Source: Research Square preprint supplement (doi:10.21203/rs.3.rs-8549197/v1), 2026-02-03
Supplement: Supplementary file 1 [file d5f185e7ceb5b25d973b21e2.docx]

**Appendix A List of products**

*Table A1: List of products and their characteristics, by country and category*

| Country | Category | Product | Description | Price | Weight | Kcal | Limit Date |
| --- | --- | --- | --- | --- | --- | --- | --- |
| BG | Carbs | A | Bread | 2.35 | 650 | 267 | 06/03/2023 |
| BG | Carbs | B | Bread | 2.35 | 550 | 283 | 08/03/2023 |
| BG | Carbs | C | Rice | 1.99 | 500 | 339 | 26/10/2023 |
| BG | Carbs | D | Rice | 2.49 | 500 | 340 | 30/11/2023 |
| BG | Carbs | E | Pasta (orzo) | 2.79 | 500 | 362 | 31/10/2023 |
| BG | Carbs | F | Pasta (orzo) | 3.29 | 500 | 354 | 30/09/2023 |
| BG | Carbs | G | Lentils | 3.49 | 500 | 353 | 01/02/2024 |
| BG | Carbs | H | Lentils | 2.89 | 500 | 384 | 14/11/2023 |
| BG | Dairy | A | Milk | 3.39 | 1000 | 64 | 09/03/2023 |
| BG | Dairy | B | Milk | 3.39 | 1000 | 63 | 08/03/2023 |
| BG | Dairy | C | Yoghurt | 1.79 | 400 | 59 | 05/03/2023 |
| BG | Dairy | D | Yoghurt | 1.69 | 400 | 62 | 09/03/2023 |
| BG | Dairy | E | Cheese | 6.99 | 200 | 354 | 28/05/2023 |
| BG | Dairy | F | Cheese | 5.99 | 200 | 279 | 11/06/2023 |
| BG | Dairy | G | Butter | 6.79 | 250 | 767 | 15/07/2023 |
| BG | Dairy | H | Butter | 6.79 | 250 | 735 | 02/06/2023 |
| BG | Protein | A | Chickpeas | 2.79 | 400 | 163 | 12/08/2023 |
| BG | Protein | B | Chickpeas | 3.99 | 400 | 364 | 18/07/2023 |
| BG | Protein | C | Chicken | 10.88 | 580 | 137 | 03/03/2023 |
| BG | Protein | D | Chicken | 10.03 | 570 | 125 | 08/03/2023 |
| BG | Protein | E | Smoked salmon | 9.29 | 100 | 183 | 15/03/2023 |
| BG | Protein | F | Smoked salmon | 9.99 | 100 | 171 | 17/03/2023 |
| BG | Protein | G | Veggie burger | 5.99 | 230 | 211 | 01/09/2023 |
| BG | Protein | H | Veggie burger | 6.99 | 113 | 270 | 30/10/2023 |
| BG | Vegs | A | Peas | 3.89 | 680 | 77 | 18/11/2023 |
| BG | Vegs | B | Peas | 4.19 | 680 | 77 | 30/11/2023 |
| BG | Vegs | C | Tomatoes | 2.79 | 400 | 26 | 31/12/2023 |
| BG | Vegs | D | Tomatoes | 2.79 | 400 | 23 | 11/12/2023 |
| BG | Vegs | E | Corn | 2.39 | 425 | 58 | 14/10/2023 |
| BG | Vegs | F | Corn | 2.29 | 400 | 103 | 25/10/2023 |
| BG | Vegs | G | Bagged salad | 4.29 | 250 | 22 | 05/03/2023 |
| BG | Vegs | H | Bagged salad | 3.69 | 250 | 15 | 07/03/2023 |
| DE | Carbs | A | Pasta | 1.99 | 400 | 361 | 12/08/2023 |
| DE | Carbs | B | Pasta | 1.89 | 400 | 352 | 29/09/2023 |
| DE | Carbs | C | Bread | 0.89 | 500 | 220 | 04/04/2023 |
| DE | Carbs | D | Bread | 1.69 | 500 | 224 | 29/03/2023 |
| DE | Carbs | E | Rice | 2.29 | 500 | 157 | 15/08/2023 |
| DE | Carbs | F | Rice | 1.99 | 500 | 351 | 12/07/2023 |
| DE | Carbs | G | Red lentils | 2.79 | 750 | 322 | 15/07/2023 |
| DE | Carbs | H | Red lentils | 2.29 | 750 | 337 | 23/07/2023 |
| DE | Dairy | A | Milk | 1.39 | 1000 | 67 | 24/03/2023 |
| DE | Dairy | B | Milk | 1.79 | 1000 | 64 | 26/03/2023 |
| DE | Dairy | C | Yoghurt | 1.19 | 500 | 65 | 06/04/2023 |
| DE | Dairy | D | Yoghurt | 1.29 | 500 | 70 | 02/04/2023 |
| DE | Dairy | E | Butter | 3.39 | 250 | 747 | 23/05/2023 |
| DE | Dairy | F | Butter | 3.49 | 250 | 748 | 17/05/2023 |
| DE | Dairy | G | Mozzarella cheese | 0.99 | 120 | 245 | 08/04/2023 |
| DE | Dairy | H | Mozzarella cheese | 0.99 | 250 | 246 | 05/04/2023 |
| DE | Protein | A | Smoked salmon | 3.99 | 100 | 216 | 30/03/2023 |
| DE | Protein | B | Smoked salmon | 4.09 | 100 | 180 | 02/04/2023 |
| DE | Protein | C | Chickpeas | 1.69 | 265 | 120 | 05/09/2023 |
| DE | Protein | D | Chickpeas | 1.49 | 240 | 72 | 22/09/2023 |
| DE | Protein | E | Meat | 2.99 | 250 | 234 | 23/03/2023 |
| DE | Protein | F | Meat | 4.79 | 250 | 176 | 28/03/2023 |
| DE | Protein | G | Vegetarian bacon | 2.99 | 130 | 140 | 15/05/2023 |
| DE | Protein | H | Vegetarian bacon | 1.99 | 90 | 228 | 09/05/2023 |
| DE | Vegs | A | Green beans | 0.79 | 220 | 24 | 27/08/2023 |
| DE | Vegs | B | Green beans | 1.69 | 220 | 26 | 13/09/2023 |
| DE | Vegs | C | Mushrooms | 2.29 | 230 | 20 | 30/07/2023 |
| DE | Vegs | D | Mushrooms | 1.19 | 230 | 16 | 13/07/2023 |
| DE | Vegs | E | Tomatoes | 0.69 | 240 | 23 | 11/09/2023 |
| DE | Vegs | F | Tomatoes | 2.6 | 260 | 22 | 28/09/2023 |
| DE | Vegs | G | Corn | 1.19 | 285 | 79 | 15/10/2023 |
| DE | Vegs | H | Corn | 1.69 | 285 | 80 | 09/10/2023 |
| ES | Carbs | A | Pasta | 1.95 | 500 | 353 | 15/10/2023 |
| ES | Carbs | B | Pasta | 2.41 | 500 | 356 | 04/11/2023 |
| ES | Carbs | C | Bread | 2.45 | 600 | 249 | 29/03/2023 |
| ES | Carbs | D | Bread | 2.89 | 590 | 272 | 27/03/2023 |
| ES | Carbs | E | Rice | 1.55 | 1000 | 343 | 15/08/2023 |
| ES | Carbs | F | Rice | 1.69 | 1000 | 346 | 24/08/2023 |
| ES | Carbs | G | Lentils | 1.6 | 1000 | 281 | 12/09/2023 |
| ES | Carbs | H | Lentils | 1.75 | 500 | 281 | 01/10/2023 |
| ES | Dairy | A | Milk | 0.99 | 1000 | 46 | 15/03/2023 |
| ES | Dairy | B | Milk | 1.05 | 1000 | 46 | 21/03/2023 |
| ES | Dairy | C | Yoghurt | 2.09 | 500 | 79 | 28/03/2023 |
| ES | Dairy | D | Yoghurt | 2.29 | 500 | 73 | 31/03/2023 |
| ES | Dairy | E | Butter | 3.35 | 250 | 739 | 04/05/2023 |
| ES | Dairy | F | Butter | 3.13 | 250 | 742 | 15/05/2023 |
| ES | Dairy | G | Cheese | 2.67 | 150 | 338 | 03/04/2023 |
| ES | Dairy | H | Cheese | 2.35 | 130 | 353 | 08/04/2023 |
| ES | Protein | A | Tuna | 3.35 | 195 | 286 | 04/09/2023 |
| ES | Protein | B | Tuna | 2.89 | 210 | 198 | 24/10/2023 |
| ES | Protein | C | Peas | 2.25 | 500 | 378 | 15/05/2023 |
| ES | Protein | D | Peas | 2.05 | 500 | 348 | 03/06/2023 |
| ES | Protein | E | Chicken | 3.04 | 400 | 83 | 26/03/2023 |
| ES | Protein | F | Chicken | 3.58 | 400 | 101 | 24/03/2023 |
| ES | Protein | G | Quinoa | 2.99 | 500 | 368 | 13/07/2023 |
| ES | Protein | H | Quinoa | 2.61 | 500 | 382 | 29/07/2023 |
| ES | Vegs | A | Green beans | 2.59 | 360 | 12 | 15/06/2023 |
| ES | Vegs | B | Green beans | 2.65 | 350 | 14 | 25/06/2023 |
| ES | Vegs | C | Green peas | 3.79 | 400 | 31 | 30/06/2023 |
| ES | Vegs | D | Green peas | 3.59 | 660 | 30 | 20/06/2023 |
| ES | Vegs | E | Tomatoes | 1.95 | 630 | 76 | 23/08/2023 |
| ES | Vegs | F | Tomatoes | 1.65 | 636 | 73 | 03/09/2023 |
| ES | Vegs | G | Salad | 1 | 200 | 15 | 25/03/2023 |
| ES | Vegs | H | Salad | 1.99 | 100 | 18 | 01/04/2023 |

**Appendix B: Randomization**

Table B1 specifies the way we randomized the presentation of products for different consumers. There were four **random orders**, which differ in which **label types** were shown for each products in each category. The order of pairs of products was kept fixed within categories, but the order in which categories were shown was also randomized, and the position of products was randomized as well (either to the left or to the right).

We also varied what information was shown in the QR code, whereby

- IC1: Nutrition declaration;
- IC2: Net quantity of the food;
- IC3: Date marking (use by/best before);
- IC4: Any special storage conditions and/or conditions of use (when relevant);
- IC5: Name or business name and address of the food business operator;
- IC6: Ingredients;

If both products had DFI, then they both showed the same information type in the QR code.

Finally, we varied what information participants were asked to remember in case the product pair was among the last three choices.

*Table B1: Randomization of information condition and knowledge questions*

| Random order | Category | Menu in category | Label types | Info in DFI | Info asked about if last three |
| --- | --- | --- | --- | --- | --- |
| 1 | 1 | 1 | DFI-DFI | IC1 |  |
| 1 | 1 | 2 | DFI-Label | IC2 | IC2 |
| 1 | 1 | 3 | Label-DFI | IC3 | IC3 |
| 1 | 1 | 4 | Label-Label | NA | IC1 |
| 1 | 2 | 1 | DFI-DFI | IC4 |  |
| 1 | 2 | 2 | DFI-Label | IC5 | IC2 |
| 1 | 2 | 3 | Label-DFI | IC6 | IC3 |
| 1 | 2 | 4 | Label-Label | NA | IC1 |
| 1 | 3 | 1 | DFI-DFI | IC1 |  |
| 1 | 3 | 2 | DFI-Label | IC2 | IC2 |
| 1 | 3 | 3 | Label-DFI | IC3 | IC3 |
| 1 | 3 | 4 | Label-Label | NA | IC1 |
| 1 | 4 | 1 | DFI-DFI | IC4 |  |
| 1 | 4 | 2 | DFI-Label | IC5 | IC2 |
| 1 | 4 | 3 | Label-DFI | IC6 | IC3 |
| 1 | 4 | 4 | Label-Label | NA | IC1 |
| 2 | 1 | 1 | DFI-Label | IC1 |  |
| 2 | 1 | 2 | Label-DFI | IC2 | IC1 |
| 2 | 1 | 3 | Label-Label | NA | IC2 |
| 2 | 1 | 4 | DFI-DFI | IC3 | IC3 |
| 2 | 2 | 1 | DFI-Label | IC4 |  |
| 2 | 2 | 2 | Label-DFI | IC5 | IC1 |
| 2 | 2 | 3 | Label-Label | NA | IC2 |
| 2 | 2 | 4 | DFI-DFI | IC6 | IC3 |
| 2 | 3 | 1 | DFI-Label | IC1 |  |
| 2 | 3 | 2 | Label-DFI | IC2 | IC1 |
| 2 | 3 | 3 | Label-Label | NA | IC2 |
| 2 | 3 | 4 | DFI-DFI | IC3 | IC3 |
| 2 | 4 | 1 | DFI-Label | IC4 |  |
| 2 | 4 | 2 | Label-DFI | IC5 | IC1 |
| 2 | 4 | 3 | Label-Label | NA | IC2 |
| 2 | 4 | 4 | DFI-DFI | IC6 | IC3 |
| 3 | 1 | 1 | Label-DFI | IC6 |  |
| 3 | 1 | 2 | Label-Label | NA | IC3 |
| 3 | 1 | 3 | DFI-DFI | IC5 | IC2 |
| 3 | 1 | 4 | DFI-Label | IC4 | IC1 |
| 3 | 2 | 1 | Label-DFI | IC3 |  |
| 3 | 2 | 2 | Label-Label | NA | IC3 |
| 3 | 2 | 3 | DFI-DFI | IC2 | IC2 |
| 3 | 2 | 4 | DFI-Label | IC1 | IC1 |
| 3 | 3 | 1 | Label-DFI | IC6 |  |
| 3 | 3 | 2 | Label-Label | NA | IC3 |
| 3 | 3 | 3 | DFI-DFI | IC5 | IC2 |
| 3 | 3 | 4 | DFI-Label | IC4 | IC1 |
| 3 | 4 | 1 | Label-DFI | IC3 |  |
| 3 | 4 | 2 | Label-Label | NA | IC3 |
| 3 | 4 | 3 | DFI-DFI | IC2 | IC2 |
| 3 | 4 | 4 | DFI-Label | IC1 | IC1 |
| 4 | 1 | 1 | Label-Label | NA |  |
| 4 | 1 | 2 | DFI-DFI | IC6 | IC1 |
| 4 | 1 | 3 | DFI-Label | IC5 | IC3 |
| 4 | 1 | 4 | Label-DFI | IC4 | IC2 |
| 4 | 2 | 1 | Label-Label | NA |  |
| 4 | 2 | 2 | DFI-DFI | IC1 | IC1 |
| 4 | 2 | 3 | DFI-Label | IC3 | IC3 |
| 4 | 2 | 4 | Label-DFI | IC2 | IC2 |
| 4 | 3 | 1 | Label-Label | NA |  |
| 4 | 3 | 2 | DFI-DFI | IC6 | IC1 |
| 4 | 3 | 3 | DFI-Label | IC5 | IC3 |
| 4 | 3 | 4 | Label-DFI | IC4 | IC2 |
| 4 | 4 | 1 | Label-Label | NA |  |
| 4 | 4 | 2 | DFI-DFI | IC1 | IC1 |
| 4 | 4 | 3 | DFI-Label | IC3 | IC3 |
| 4 | 4 | 4 | Label-DFI | IC2 | IC2 |

**Appendix C: Final survey**

*Table C1: Final survey*

| **Block 1. Socio-demographic profile** |
| --- |
| Q1. How old are you?  Include list of numbers |
| Q2. Are you…?  Male  Female  Other  Prefer not to respond |
| Q3. What is the highest level of education you have successfully completed (usually by obtaining a certificate or diploma)?   Primary school or less  High school  Some years of university (not completed)  University degree completed  Post-graduate (master, PhD, other) |
| Q4. What is your legal marital status?  Married or in Civil Partnership  Single (Never married)  Separated/Divorced  Widowed |
| Q5.  What is your household's monthly income?  [adapted country by country by considering income distribution by quintile, Eurostat, 2021]  Bulgaria:  500 Lev or below (Quintile 1)  501 Lev – 700 Lev (Quintile 2)  701 Lev – 1000 Lev (Quintile 3)  1001 Lev – 1400 Lev (Quintile 4)  1401 Lev or above   (Quintile 5)  Germany:  1400 Euro or below (Quintile 1)  1401 Euro – 1900 Euro (Quintile 2)  1901 Euro – 2400 Euro (Quintile 3)  2401 Euro – 3200 Euro (Quintile 4)  3201 Euro or above   (Quintile 5)  Spain:  800 Euro or below (Quintile 1)  801 Euro – 1200 Euro (Quintile 2)  1201 Euro – 1500 Euro (Quintile 3)  1501 Euro – 2000 Euro (Quintile 4)  2001 Euro or above   (Quintile 5) |
| Q6. Which of the following situations best describes your current situation?  Employed full time  Employed part time  Unemployed or unable to work  Homemaker  Student  Retired  Other |
| Q7. Which of the following best describes where you live?  A big city  The suburbs or outskirts of a big city  A town or a small city  A country village  A farm or home in the countryside |
|  |
| **Block 2. Internet/smartphone/app/QR usage and familiarity** |
| Q1. Do you have a smartphone (that is, a mobile phone with a touchscreen)?  Yes  No |
| Q2. Do you use your smartphone to access the Internet?  Yes  No |
| Q3. Have you ever scanned a QR code for a food product?  Yes  No |
| Q4. In the future, how likely would you scan a QR code on a food product to access food information?  Very likely  Quite likely  Quite unlikely  Very unlikely |
| Q5. How do you feel about the idea of having QR codes on food products to access food information?  I really like it  I like it  I dislike it  I really dislike it |
| Q6. What would be a problem with having QR codes on food products? [allow multiple answers]  It would take too much time and effort to scan them  I think it is not safe to scan QR codes  I would need to read additional information about the product  I would have to go on the Internet to access food information  It would be difficult to read information on my phone  I do not have a smartphone, or I often do not have my phone with me  For another reason (write down):  I cannot think of any problem with QR codes |
| Q7. What would be a benefit of having QR codes on food products? [allow multiple answers]  It would be easier to get information about the product  I would get more information about the product  I would have access to food information on the Internet  It would be easier to read the information on my phone  I would be able to read product information in my own language  For another reason (write down)  I cannot think of any benefit of QR codes |
|  |
| **Block 3. Dietary and food-related habits** |
| Q1. How often do you PERSONALLY buy groceries for your household?  Daily or almost daily  About once a week  Once or twice a month  Once every two months  Never or almost never |
| Q2. Have you ever purchased groceries online?  No, never  Yes, one time  Yes, a few times  Yes, regularly |
| Q3. How often do you cook your own meals and eat them at home?  Daily or almost daily  About once a week  Once or twice a month  Once every two months  Never or almost never |
| Q4. What is your average daily consumption of fresh fruits and vegetables? (A portion is for example one tomato, or one apple)  0 portions  1 to 4 portions  5 or more portions |
| Q5. Do you have any of the following dietary restrictions?  Vegan  Vegetarian  Lacto Vegetarian  Ovo Vegetarian  Kosher  Halaal  Food Allergy (e.g. gluten free, peanut free)  I have other dietary restrictions (specify)  I do not have any of these dietary restrictions |
| Q6. How often do you read the labels on the food products you purchase?  Always  Frequently  Sometimes  Rarely  Never or almost never  I don’t know / I am not sure |
| Q7. When buying food, how much do you rely on, and trust, the information provided on the label?  Scale from 0 to 10 (0 = means you do not trust at all; 10 = you have complete trust) |
| Q9. When you buy food, which of the following are the most important to you?  Whether the item complies with your ethics and beliefs, (e.g in terms of religion, animal welfare or fair payment of producers)  Whether the food is safe to eat  The price of the product  Nutrient content (e.g., the amount of vitamins, fiber, proteins, sugar, or fats)  How the food tastes  Where the food comes from (e.g., geographical origin)  Convenience (e.g., the easiness to use, prepare)  How much processing the food went through  The amount of shelf-life available  The product's impact on the environment and climate (e.g., carbon footprint)  Other (please specify)  I don't know |
|  |
| **Block 4. Consumer vulnerability** |
| Q1. What is your native language?  Bulgarian  German  Castellano  Català  Valenciano  Gallego  Euskera  Aranés  Other (please specify) |
| Q2. How do you perceive your health in general?  Very good  Good  Fair  Bad  Very bad |
| Q3. What is your height? (In cm) |
| Q4. What is your weight? (In kg) |
| Q5. Thinking about your household’s financial situation, how easy or difficult would you say it is to make ends meet?  Very easy  Fairly easy  Neither easy nor difficult  Fairly difficult  Very difficult  I don’t know |
| Q6. In the following, please indicate if the statement corresponds to your experience or not: (all responses on the 1-5 scale, 1 = “corresponds to me perfectly” to 5 = “does not correspond to me at all”)  There are too many similar products to choose from  There is too much information to consider when choosing products  Product information is often unclear and confusing  It takes me a long time to decide what product to buy  I always buy the same products when I go shopping |
| Q7. In the following, please indicate if the statement corresponds to you or not: (all responses on the 1-5 scale, 1 = “corresponds to me perfectly” to 5 = “does not correspond to me at all”)  1. I prefer complex to simple problems.  2. I like handling situations that requires a lot of thinking.  3. Thinking is not my idea of fun.  4. I would rather do something that requires little thought than something that is sure to challenge my thinking abilities.  5. I really enjoy a task that involves coming up with new solutions to problems.  6. I would prefer a task that is intellectual, difficult, and important to one that is somewhat important but does not require much thought. |

**Appendix D: Regressions**

*Table D1: Choice of product with a Hybrid label in Hybrid-Paper and Paper-Hybrid information conditions*

|  | Hybrid_chosen | | | | |
| --- | --- | --- | --- | --- | --- |
|  | (1) | (2) | (3) | (4) | (5) |
| Paper-Hybrid | 0.004 | 0.006 | 0.011 | 0.002 |  |
| Choice order |  | 0.001* | 0.001* | 0.002* |  |
| diff_known |  | 0.181*** | 0.181*** | 0.181*** |  |
| diff_price |  | -0.109*** | -0.109*** | -0.109*** |  |
| diff_weight |  | 0.0003*** | 0.0003*** | 0.0003*** |  |
| diff_kcal |  | -0.0002*** | -0.0002*** | -0.0003*** |  |
| diff_date |  | 0.001*** | 0.001*** | 0.001*** |  |
| Category Dairy |  |  | -0.005 | -0.004 |  |
| Category Protein |  |  | 0.003 | 0.003 |  |
| Category Vegs |  |  | -0.008 | -0.007 |  |
| IC Nutrition |  |  | -0.018 | -0.020 |  |
| IC Quantity |  |  | -0.019 | -0.017* |  |
| IC Date |  |  | 0.007 | 0.011 |  |
| IC Name |  |  | 0.011 |  |  |
| IC Ingredients |  |  | -0.023 |  |  |
| diff_weight & IC == "Quantity" |  |  |  | 0.00002 |  |
| diff_kcal & IC == "Nutrition" |  |  |  | 0.0001 |  |
| diff_date & IC == "Date" |  |  |  | -0.001* |  |
| Germany |  |  |  |  | 0.014 |
| Spain |  |  |  |  | -0.001 |
| Age>55 |  |  |  |  | -0.017* |
| Low Education |  |  |  |  | -0.012 |
| Rural Location |  |  |  |  | 0.005 |
| Low Income |  |  |  |  | 0.005 |
| Financial Constraint |  |  |  |  | -0.010 |
| Constant |  |  |  |  | 0.508*** |
| Observations | 27,360 | 27,360 | 27,360 | 27,360 | 3,420 |
| R2 | 0.00002 | 0.068 | 0.069 | 0.069 | 0.004 |
| F Statistic | 0.447 | 250.747*** | 118.356*** | 110.809*** | 1.936 |

*p<0.05 **p<0.01***p<0.001

*Table D2: Likelihood to scan one or both QR codes in a pair, by menu characteristics and vulnerability indicators*

|  | | | | |
| --- | --- | --- | --- | --- |
|  | *Dependent variable:* | | | |
|  | At least one QR code scanned | | | |
|  | (1) | (2) | (3) | (4) |
| Both_Hybrid | 0.016*** | 0.016*** | 0.006 |  |
| Choice order |  | -0.009*** | -0.008*** |  |
| abs(diff_known) |  | -0.006 | -0.004 |  |
| abs(diff_price) |  | -0.015*** | -0.005 |  |
| abs(diff_weight) |  | -0.0001*** | -0.0001** |  |
| abs(diff_kcal) |  | 0.0001** | 0.0001 |  |
| abs(diff_date) |  | 0.00001 | -0.0001 |  |
| Category Dairy |  |  | -0.009 |  |
| Category Protein |  |  | -0.002 |  |
| Category Vegs |  |  | -0.008 |  |
| IC Nutrition |  |  | 0.111*** |  |
| IC Quantity |  |  | 0.048*** |  |
| IC Date |  |  | 0.014** |  |
| IC Name |  |  | 0.004 |  |
| IC Ingredients |  |  | 0.004 |  |
| Germany |  |  |  | -0.015 |
| Spain |  |  |  | 0.036** |
| Age>55 |  |  |  | 0.013 |
| Low Education |  |  |  | 0.009 |
| Rural Location |  |  |  | 0.022 |
| Low Income |  |  |  | -0.011 |
| Financial Constraint |  |  |  | -0.001 |
| Constant |  |  |  | 0.225*** |
| Observations | 41,040 | 41,040 | 41,040 | 3,420 |
| R2 | 0.001 | 0.020 | 0.037 | 0.006 |
| F Statistic | 24.139*** | 111.739*** | 97.427*** | 2.819** |

*p<0.05 **p<0.01***p<0.001

abs(x) means absolute value of x

*Table D3: Speed of choice by menu characteristics and vulnerability indicators*

|  | | | | | |
| --- | --- | --- | --- | --- | --- |
|  | *Dependent variable: choice speed (in seconds)* | | | | |
|  | (1) | (2) | (3) | (4) | (5) |
| One Hybrid | 0.882*** | 0.880*** | 1.507*** |  |  |
| Both Hybrid | 1.625*** | 1.623*** | 2.048*** |  |  |
| Choice order |  | -0.669*** | -0.674*** |  |  |
| abs(diff_known) |  | -1.335*** | -1.247*** |  |  |
| abs(diff_price) |  | -0.616*** | -0.584** |  |  |
| abs(diff_weight) |  | -0.0001 | -0.001 |  |  |
| abs(diff_kcal) |  | 0.016*** | 0.009*** |  |  |
| abs(diff_date) |  | -0.017*** | -0.026*** |  |  |
| Category Dairy |  |  | -0.660** |  |  |
| Category Protein |  |  | 0.838*** |  |  |
| Category Vegs |  |  | -1.008*** |  |  |
| IC Nutrition |  |  | 0.549* |  |  |
| IC Quantity |  |  | -0.915*** |  |  |
| IC Date |  |  | -0.571* |  |  |
| IC Name |  |  | -1.860*** |  |  |
| IC Ingredients |  |  | -0.788** |  |  |
| Germany |  |  |  | -2.922*** |  |
| Spain |  |  |  | -1.514** |  |
| Age>55 |  |  |  | 5.606*** |  |
| Low Education |  |  |  | -0.232 |  |
| Rural Location |  |  |  | 0.125 |  |
| Low Income |  |  |  | -1.305** |  |
| Financial Constraint |  |  |  | 0.912 |  |
| DFI |  |  |  |  | 0.764* |
| DFI*Germany |  |  |  |  | 0.112 |
| DFI*Spain |  |  |  |  | 0.076 |
| DFI*Age>55 |  |  |  |  | 0.953* |
| DFI*Low Education |  |  |  |  | -0.027 |
| DFI*Rural Location |  |  |  |  | 0.003 |
| DFI*Low Income |  |  |  |  | 0.079 |
| DFI*Financial Constraint |  |  |  |  | 0.467 |
| Constant |  |  |  | 17.807*** |  |
|  | | | | | |
| Observations | 44,234 | 44,234 | 44,234 | 3,420 | 44,234 |
| R2 | 0.002 | 0.040 | 0.044 | 0.050 | 0.001 |
| F Statistic | 36.364*** | 210.994*** | 116.770*** | 25.628*** | 7.582*** |
|  | | | | | |

*p<0.05 **p<0.01***p<0.001

abs(x) means absolute value of x

*Table D4: Report error by menu characteristic and vulnerability indicators*

|  | | | | | | | | | |
| --- | --- | --- | --- | --- | --- | --- | --- | --- | --- |
|  | *Dependent variable: Report error* | | | | | | | | |
|  | (1) weight | (2) calories | (3) date | (4) weight | (5) calories | (6) date | (7) weight | (8) calories | (9) date |
| QR code | 0.009 | 0.016 | 0.053* |  |  |  | 0.008 | -0.008 | 0.122* |
| Germany |  |  |  | 0.075*** | 0.001 | 0.198*** |  |  |  |
| Spain |  |  |  | 0.156*** | 0.188*** | 0.184*** |  |  |  |
| Age>55 |  |  |  | -0.037* | 0.025 | 0.035 |  |  |  |
| Low Education |  |  |  | 0.006 | 0.008 | 0.052 |  |  |  |
| Rural Location |  |  |  | -0.041* | -0.017 | -0.022 |  |  |  |
| Low Income |  |  |  | 0.027 | 0.068* | 0.069 |  |  |  |
| Financial Constraint |  |  |  | 0.004 | -0.042 | -0.001 |  |  |  |
| QR & Germany |  |  |  |  |  |  | -0.020 | 0.026 | -0.137* |
| QR & Spain |  |  |  |  |  |  | 0.011 | 0.008 | -0.060 |
| QR & Age>25 |  |  |  |  |  |  | -0.036 | 0.006 | -0.108 |
| QR & Low Education |  |  |  |  |  |  | 0.014 | -0.029 | 0.028 |
| QR & Rural Location |  |  |  |  |  |  | 0.019 | 0.062 | -0.034 |
| QR & Low Income |  |  |  |  |  |  | 0.003 | 0.055 | -0.055 |
| QR & Financial Constraint |  |  |  |  |  |  | 0.007 | -0.041 | 0.148* |
| Constant |  |  |  | 0.310*** | 0.713*** | 1.049*** |  |  |  |
|  | | | | | | | | | |
| Observations | 6,768 | 6,768 | 5,439 | 3,393 | 3,399 | 2,873 | 6,768 | 6,768 | 5,439 |
| R2 | 0.0005 | 0.0003 | 0.002 | 0.027 | 0.017 | 0.011 | 0.003 | 0.002 | 0.008 |
| F Statistic | 1.548 | 1.178 | 4.741* | 13.404*** | 8.270*** | 4.651*** | 1.116 | 0.971 | 2.501* |

*p<0.05 **p<0.01***p<0.001
